# Supplementary material for: TaER Expression Is Associated with Transpiration Efficiency Traits and Yield in Bread Wheat
Source: PubMed Central journal article supplement (PMC4457575; doi:10.1371/journal.pone.0128415), 2015-06-05
Supplement: pone.0128415.s001.pdf [file pone.0128415.s001.pdf]

**S1 Table. Name and planting region of the 48 wheat varieties**

| <b>No.</b> | <b>Genotype</b> | <b>Planting Region*</b> | <b>Province of Origin</b> |
|------------|-----------------|-------------------------|---------------------------|
| 1          | Yunhan 22-33    | Huang-huai WWR          | Shanxi                    |
| 2          | Luohan 6        | Huang-huai WWR          | Henan                     |
| 3          | Shijiazhuang 8  | Huang-huai WWR          | Hebei                     |
| 4          | Hanyou 98       | Huang-huai WWR          | Shandong                  |
| 5          | Zhonghan 110    | Northern WWR            | Beijing                   |
| 6          | Youmai 2        | Northern WWR            | Shandong                  |
| 7          | Changwu 134     | Huang-huai WWR          | Shaanxi                   |
| 8          | Jinmai 47       | Northern WWR            | Shanxi                    |
| 9          | Changwu 863     | Huang-huai WWR          | Shaanxi                   |
| 10         | Changwu 521-7   | Huang-huai WWR          | Shaanxi                   |
| 11         | Shan 229        | Huang-huai WWR          | Shaanxi                   |
| 12         | Xiaoyan 6       | Huang-huai WWR          | Shaanxi                   |
| 13         | Shanmai 168     | Huang-huai WWR          | Shaanxi                   |
| 14         | Pubing 201      | Huang-huai WWR          | Shaanxi                   |
| 15         | Shan 512        | Huang-huai WWR          | Shaanxi                   |
| 16         | Xiaoyan 22-3    | Huang-huai WWR          | Shaanxi                   |
| 17         | Pubing 143      | Huang-huai WWR          | Shaanxi                   |
| 18         | Xinong 389      | Huang-huai WWR          | Shaanxi                   |
| 19         | Liken 2         | Huang-huai WWR          | Shaanxi                   |
| 20         | Lantian 10      | Huang-huai WWR          | Shaanxi                   |
| 21         | Xinong 811      | Huang-huai WWR          | Shaanxi                   |
| 22         | Jing 411        | Northern WWR            | Beijing                   |
| 23         | Jinan 18        | Northern WWR            | Shandong                  |
| 24         | Qinnong 712     | Huang-huai WWR          | Shaanxi                   |
| 25         | Jiufeng 22      | Huang-huai WWR          | Shaanxi                   |
| 26         | Ligao 6         | Huang-huai WWR          | Shaanxi                   |
| 27         | Changwu 58-61   | Huang-huai WWR          | Shaanxi                   |
| 28         | Jing 2001       | Northwest WWR           | Gansu                     |
| 29         | Mianyang 11     | Southwestern WWR        | Sichuan                   |
| 30         | Jining 13       | Northern WWR            | Shandong                  |
| 31         | Xinmai 19       | Huang-huai WWR          | Henan                     |
| 32         | Zhou 17         | Huang-huai WWR          | Henan                     |
| 33         | Zhou 19         | Huang-huai WWR          | Henan                     |
| 34         | Yuanfeng 175    | Huang-huai WWR          | Shaanxi                   |
| 35         | Yuanfeng 139    | Huang-huai WWR          | Shaanxi                   |
| 36         | Fengchan 3      | Huang-huai WWR          | Shaanxi                   |
| 37         | Xinong 889      | Huang-huai WWR          | Shaanxi                   |
| 38         | Xinong 979      | Huang-huai WWR          | Shaanxi                   |
| 39         | Xinong 928      | Huang-huai WWR          | Shaanxi                   |
| 40         | Xiaoyan 81      | Northern WWR            | Beijing                   |
| 41         | Shan 7859       | Huang-huai WWR          | Shaanxi                   |
| 42         | Drysdale        | Australia SWR           | New south wales           |

|    |             |                |                 |
|----|-------------|----------------|-----------------|
| 43 | Quarrion    | Australia SWR  | New south wales |
| 44 | Luomai 21   | Huang-huai WWR | Henan           |
| 45 | Jinmai 33   | Northern WWR   | Shanxi          |
| 46 | Xifeng 20   | Huang-huai WWR | Gansu           |
| 47 | Ningchun 45 | Northwest SWR  | Ningxia         |
| 48 | Hongmangmai | Northwest SWR  | Ningxia         |

---

\*WWR: Winter wheat region; SWR: Spring wheat region.
