# Supplementary material for: TaER Expression Is Associated with Transpiration Efficiency Traits and Yield in Bread Wheat
Source: PubMed Central journal article supplement (PMC4457575; doi:10.1371/journal.pone.0128415), 2015-06-05
Supplement: pone.0128415.s002.pdf [file pone.0128415.s002.pdf]

**S2 Table. Primer sequences used for expression analysis of *TaER1* and *TaER2***

| Primer            | Primer sequence (5'–3')         | Usage                                                                                    |
|-------------------|---------------------------------|------------------------------------------------------------------------------------------|
| <i>TaER1-F</i>    | AACTGAGCTTGAGACTGTCGGC          | qRT-PCR of <i>TaER1</i><br>(chromosome 7)                                                |
| <i>TaER1-R</i>    | CCAGAGGCTGCCATTTTCCATG          |                                                                                          |
| <i>TaER2-F</i>    | GAACTTGAGGGAACGATACCTG          | qRT-PCR of <i>TaER2</i><br>(chromosome 6)                                                |
| <i>TaER2-R</i>    | AAGCTTGTGCAATGAACGTGGG          |                                                                                          |
| <i>TaER1_AS-F</i> | CGGGCTCAACCTCGAGGGCGAAATCTCT    | qRT-PCR of <i>TaER1</i> in<br>relation to the three<br>orthologs in A, B and D<br>genome |
| <i>TaER1_AS-R</i> | GCGTCTTAATCGATGAGCAATCCCAATCTCG |                                                                                          |
| <i>TaER1_BS-F</i> | CTCCCACAACACAGAGTAGGACTTTGAGTCT |                                                                                          |
| <i>TaER1_BS-R</i> | CTACTCGTCTGACTGACTACCTGCTTGC    |                                                                                          |
| <i>TaER1_DS-F</i> | ACAACACGGAGTAGGACGGAGAGGCC      |                                                                                          |
| <i>TaER1_DS-R</i> | TTGCTACTACTCGTCTGACCGACTACCTGG  |                                                                                          |
| <i>TaER2_AL-F</i> | GGCTACATTGACCCTGAGTATGCGCGG     | qRT-PCR of <i>TaER2</i> in<br>relation to the three<br>orthologs in A, B and D<br>genome |
| <i>TaER2_AL-R</i> | TTGTCAACTGGCTTCTTCCCAGTCAGCAG   |                                                                                          |
| <i>TaER2_BL-F</i> | TTGCTGACTGGGAAGAAGCCAGTTGACAAC  |                                                                                          |
| <i>TaER2_BL-R</i> | GGCACCGTCGCCTTCTCCTCTTAGCCG     |                                                                                          |
| <i>TaER2_DL-F</i> | TCCCCGGGCTACTGCTCCTGGCT         |                                                                                          |
| <i>TaER2_DL-R</i> | GGAGGACAGGTTCAACATTTTAAGCGACC   |                                                                                          |
| <i>TaActin-F</i>  | TTGCTGACCGTATGAGCAAG            | Reference genes in wheat                                                                 |
| <i>TaActin-R</i>  | ACCCTCCAATCCAGACTG              |                                                                                          |
| <i>TaSand-F</i>   | TGCCTTGCCCATAAGAAATC            |                                                                                          |
| <i>TaSand-R</i>   | GTGCGGACCAGTTGCTTTAT            |                                                                                          |
| <i>TaCell-F</i>   | GAGGAGGATGAGGTGGATGA            |                                                                                          |
| <i>TaCell-R</i>   | CCTGGTACTTGCGGATGTCT            |                                                                                          |
