# Supplementary material for: TaER Expression Is Associated with Transpiration Efficiency Traits and Yield in Bread Wheat
Source: PubMed Central journal article supplement (PMC4457575; doi:10.1371/journal.pone.0128415), 2015-06-05
Supplement: pone.0128415.s003.pdf [file pone.0128415.s003.pdf]

**S3 Table. *TaER* relative expression in 48 wheat varieties**

| Group | Genotype<br>No. | <i>TaER1</i> |                    | <i>TaER2</i> |                    |
|-------|-----------------|--------------|--------------------|--------------|--------------------|
|       |                 | Heading(Z55) | Grain-filling(Z73) | Heading(Z55) | Grain-filling(Z73) |
| I     | 1               | 0.6611 d     | 0.5242 e           | 0.6041 b     | 0.5505 c           |
|       | 3               | 0.6715 c     | 0.5571 c           | 0.5979 b     | 0.5417 d           |
|       | 35              | 0.6868 b     | 0.5613 c           | 0.5933 b     | 0.5791 b           |
|       | 36              | 0.6977 a     | 0.5730 b           | 0.5929 b     | 0.5845 b           |
|       | 42              | 0.6987 a     | 0.5812 a           | 0.6183 a     | 0.6072 a           |
| II    | 2               | 0.5906 g     | 0.4808 h           | 0.5364 d     | 0.4687 g           |
|       | 5               | 0.6035 f     | 0.4427 k           | 0.4522 o     | 0.4141 m           |
|       | 8               | 0.6121 e     | 0.5283 d           | 0.4845ij     | 0.4385 i           |
|       | 9               | 0.6046 f     | 0.4753 h           | 0.4519 o     | 0.4026 n           |
|       | 11              | 0.5780 h     | 0.4268 l           | 0.4610mno    | 0.4181 l           |
|       | 12              | 0.5399 l     | 0.4195 m           | 0.4664lmn    | 0.3907 o           |
|       | 14              | 0.5813 h     | 0.4522 j           | 0.4833ij     | 0.4239 l           |
|       | 15              | 0.5409 l     | 0.4448 o           | 0.4748jkl    | 0.4001 n           |
|       | 16              | 0.5996 f     | 0.4518 j           | 0.5214 f     | 0.4351 j           |
|       | 17              | 0.5508 k     | 0.4602 p           | 0.4564 no    | 0.4007 n           |
|       | 18              | 0.5842 h     | 0.4409 k           | 0.5097fg     | 0.4628 h           |
|       | 19              | 0.5864 g     | 0.4990 f           | 0.5291 e     | 0.4709 g           |
|       | 21              | 0.6042 f     | 0.5194 e           | 0.5326 de    | 0.4817 f           |
|       | 22              | 0.5695 i     | 0.4771 h           | 0.5128fg     | 0.4699 g           |
|       | 23              | 0.5914 g     | 0.4911 g           | 0.5031 g     | 0.4756 f           |
|       | 25              | 0.5600 j     | 0.4811 h           | 0.4676lmn    | 0.4660 g           |
|       | 26              | 0.5762 h     | 0.4983 f           | 0.5168 f     | 0.4745 g           |
|       | 28              | 0.5454 k     | 0.4610 i           | 0.4918 hi    | 0.4589 h           |
|       | 30              | 0.5525 k     | 0.4483 j           | 0.4639lmn    | 0.4287 k           |
|       | 31              | 0.5996 f     | 0.4603 i           | 0.4995gh     | 0.4577 h           |
|       | 33              | 0.5743 i     | 0.4521 j           | 0.5567 c     | 0.5095 e           |
|       | 40              | 0.5684 i     | 0.4909 g           | 0.4663klm    | 0.3996 n           |
|       | 44              | 0.5299 m     | 0.4593 i           | 0.4963gh     | 0.3830 p           |
|       | 45              | 0.5195 n     | 0.4414 k           | 0.4863 hi    | 0.4776 f           |
| 46    | 0.5163 n        | 0.4389 k     | 0.4780ijk          | 0.4673 g     |                    |
| 47    | 0.5097 o        | 0.4116 n     | 0.4685klm          | 0.4571 h     |                    |
| 48    | 0.5008 p        | 0.4629 i     | 0.4805ijk          | 0.4810 f     |                    |
| III   | 4               | 0.4854 r     | 0.3819 r           | 0.3668 u     | 0.3279 u           |
|       | 6               | 0.4742 t     | 0.3778 r           | 0.3389 v     | 0.2920 x           |
|       | 7               | 0.4951 q     | 0.4130 n           | 0.4046 r     | 0.3472 s           |
|       | 10              | 0.4895 r     | 0.4093 n           | 0.4003 r     | 0.3428 t           |
|       | 13              | 0.4954 p     | 0.4132 n           | 0.4072 r     | 0.3512 s           |
|       | 20              | 0.4823 s     | 0.3921 q           | 0.4094 r     | 0.3643 r           |
|       | 24              | 0.4697 t     | 0.3808 r           | 0.4164 q     | 0.3716 q           |

|    |          |          |          |          |
|----|----------|----------|----------|----------|
| 27 | 0.4701 t | 0.3926 q | 0.4307 p | 0.3851 o |
| 29 | 0.4175 v | 0.3530 t | 0.4224 q | 0.3702 q |
| 32 | 0.4760 s | 0.3411 u | 0.3921 s | 0.3493 s |
| 34 | 0.4770 s | 0.3590 s | 0.3454 v | 0.3054 v |
| 37 | 0.4681 t | 0.3503 t | 0.3803 t | 0.3291 u |
| 38 | 0.4736 t | 0.4595 i | 0.4031 r | 0.3599 r |
| 39 | 0.4436 u | 0.3415 u | 0.3711 u | 0.3078 v |
| 41 | 0.3814 w | 0.3234 v | 0.3296 w | 0.3069 v |
| 43 | 0.3774 w | 0.3233 v | 0.3663 u | 0.3027 w |

---

Group I: high *TaER* expression; Group II: intermediate *TaER* expression; Group III: low *TaER* expression.

Lower case letters represent significant differences among the 48 wheat varieties ( $P < 0.05$ ).
