# Supplementary material for: TaER Expression Is Associated with Transpiration Efficiency Traits and Yield in Bread Wheat
Source: PubMed Central journal article supplement (PMC4457575; doi:10.1371/journal.pone.0128415), 2015-06-05
Supplement: pone.0128415.s004.pdf [file pone.0128415.s004.pdf]

**S4 Table. Relative expression of three homologous copies in the A, B and D genome of *TaER1* or *TaER2* in 4 wheat varieties**

| Development stage      | Homologous genes    | High <i>TaER</i> expression |               | Low <i>TaER</i> expression |               |
|------------------------|---------------------|-----------------------------|---------------|----------------------------|---------------|
|                        |                     | Wheat 36                    | Wheat 42      | Wheat 41                   | Wheat 43      |
| Heading<br>(Z55)       | <i>TaER1_AS</i>     | 0.5954                      | 0.9906        | 0.4352                     | 0.5038        |
|                        | <i>TaER1_BS</i>     | 1.4046                      | 0.9739        | 0.1630                     | 0.1571        |
|                        | <i>TaER1_DS</i>     | 0.5667                      | 1.0942        | 0.3151                     | 0.3021        |
|                        | <b><i>TaER1</i></b> | <b>0.6977</b>               | <b>0.6087</b> | <b>0.3814</b>              | <b>0.3774</b> |
|                        | <i>TaER2_AL</i>     | 1.4290                      | 0.7286        | 0.3127                     | 0.3439        |
|                        | <i>TaER2_BL</i>     | 0.8166                      | 0.9959        | 0.6245                     | 0.4525        |
|                        | <i>TaER2_DL</i>     | 1.2107                      | 1.0599        | 0.9153                     | 0.8923        |
|                        | <b><i>TaER2</i></b> | <b>0.5929</b>               | <b>0.6183</b> | <b>0.3296</b>              | <b>0.3663</b> |
| Grain-filling<br>(Z73) | <i>TaER1_AS</i>     | 0.6466                      | 0.6277        | 0.3076                     | 0.3257        |
|                        | <i>TaER1_BS</i>     | 0.8114                      | 0.7440        | 0.4035                     | 0.4893        |
|                        | <i>TaER1_DS</i>     | 0.8918                      | 0.5802        | 0.3594                     | 0.2734        |
|                        | <b><i>TaER1</i></b> | <b>0.5730</b>               | <b>0.5812</b> | <b>0.3234</b>              | <b>0.3233</b> |
|                        | <i>TaER2_AL</i>     | 0.5336                      | 0.6067        | 0.2917                     | 0.2766        |
|                        | <i>TaER2_BL</i>     | 0.4411                      | 0.6852        | 0.2632                     | 0.2276        |
|                        | <i>TaER2_DL</i>     | 0.5876                      | 0.7428        | 0.3655                     | 0.3289        |
|                        | <b><i>TaER2</i></b> | <b>0.5845</b>               | <b>0.6072</b> | <b>0.3069</b>              | <b>0.3027</b> |

No.36, 42, 41, 43 are wheat variety of Fengchan3, Drysdale, Shan7859 and Quarrion. Specific primers for *TaER1\_AS*, *TaER1\_BS*, *TaER1\_DS*, *TaER2\_AL*, *TaER2\_BL* and *TaER2\_DL* were used to separate the expression for each of the three copies in A, B and D genome of *TaER1* and *TaER2*. Details of these primers were listed in S2 Table.
