# Supplementary material for: TaER Expression Is Associated with Transpiration Efficiency Traits and Yield in Bread Wheat
Source: PubMed Central journal article supplement (PMC4457575; doi:10.1371/journal.pone.0128415), 2015-06-05
Supplement: pone.0128415.s005.pdf [file pone.0128415.s005.pdf]

**S5 Table. Transpiration efficiency related traits of 48 wheat varieties at grain- filling (Z73) stage**

| Group | Genotype No. | SD (No. mm <sup>-2</sup> ) | FLA (cm <sup>2</sup> ) | A (μmol. m <sup>-2</sup> s <sup>-1</sup> ) | E (mmol. m <sup>-2</sup> s <sup>-1</sup> ) | WUEi (μmol. mmol <sup>-1</sup> ) |
|-------|--------------|----------------------------|------------------------|--------------------------------------------|--------------------------------------------|----------------------------------|
| I     | 1            | 49.98 cd                   | 32.18 b                | 21.27 bc                                   | 2.79 a                                     | 6.69 b                           |
|       | 3            | 49.64 bc                   | 33.65 a                | 21.57 b                                    | 2.68 a                                     | 6.77 b                           |
|       | 35           | 48.85 a                    | 31.12 d                | 21.54 b                                    | 2.92 ab                                    | 6.50 b                           |
|       | 36           | 48.73 a                    | 31.83 c                | 20.92 c                                    | 2.73 a                                     | 7.20 a                           |
|       | 42           | 49.03 ab                   | 31.32 d                | 22.38 a                                    | 2.70 a                                     | 6.76 b                           |
| II    | 2            | 56.21 nopq                 | 24.19 n                | 18.06 ij                                   | 4.12 lmno                                  | 5.24 jklm                        |
|       | 5            | 55.89 mno                  | 27.97 f                | 18.83 gh                                   | 4.17 mnop                                  | 5.34 jklm                        |
|       | 8            | 53.44 ij                   | 24.99 l                | 19.68 ef                                   | 3.75 ghij                                  | 5.52 hijk                        |
|       | 9            | 54.65 l                    | 24.09 n                | 17.27 mno                                  | 3.86 hijkl                                 | 5.27 jklm                        |
|       | 11           | 51.49 e                    | 25.64 j                | 17.30 mno                                  | 3.90 hijklm                                | 5.23 jklm                        |
|       | 12           | 52.34 fg                   | 25.31 k                | 17.73 jkl                                  | 3.81 hijk                                  | 5.72 fg                          |
|       | 14           | 53.03 hi                   | 27.66 g                | 17.92 jk                                   | 3.93 ijklm                                 | 5.57 ghij                        |
|       | 15           | 51.34 e                    | 25.70 j                | 17.84 jkl                                  | 4.11 lmno                                  | 5.90 cdefg                       |
|       | 16           | 51.66 e                    | 28.76 e                | 17.82 jkl                                  | 3.69 fg                                    | 5.73 fg                          |
|       | 17           | 54.25 kl                   | 23.30 p                | 17.11 nop                                  | 4.01 jklmno                                | 6.02 cdef                        |
|       | 18           | 54.12 kl                   | 27.52 gh               | 17.54 klmn                                 | 4.00 jklmn                                 | 5.46 ijkl                        |
|       | 19           | 52.98 ghi                  | 27.33 h                | 18.74 gh                                   | 3.67 fg                                    | 5.25 jklm                        |
|       | 21           | 53.12 hi                   | 27.16 h                | 19.81 ef                                   | 3.94 ijklm                                 | 5.98 cdef                        |
|       | 22           | 55.56 mn                   | 23.29 p                | 17.11 nop                                  | 3.73 ghij                                  | 6.03 cdef                        |
|       | 23           | 54.36 kl                   | 27.78 fg               | 19.72 ef                                   | 3.70 fg                                    | 5.78 defghi                      |
|       | 25           | 52.88 ghi                  | 25.64 j                | 18.65 h                                    | 3.51 efg                                   | 6.16 c                           |
|       | 26           | 50.55 d                    | 26.59 i                | 20.08 de                                   | 3.94 ijklm                                 | 5.84 cdefgh                      |
|       | 28           | 53.83 jk                   | 24.93 l                | 18.04 ij                                   | 3.69 fg                                    | 6.10 cde                         |
|       | 30           | 54.14 kl                   | 24.68 m                | 17.64 jklm                                 | 3.47 defg                                  | 5.76 efghi                       |
|       | 31           | 52.54 fgh                  | 26.33 i                | 18.45 hi                                   | 3.30 cde                                   | 5.74 efghi                       |
|       | 33           | 53.92 jk                   | 25.36 k                | 17.85 jkl                                  | 3.15 bc                                    | 5.29 jklm                        |
|       | 40           | 50.16 cd                   | 25.90 j                | 18.07 ij                                   | 3.63 fg                                    | 5.48 hijkl                       |
|       | 44           | 51.48 e                    | 24.14 n                | 19.51 f                                    | 3.24 cd                                    | 5.73 fg                          |
|       | 45           | 53.96 jk                   | 25.38 k                | 20.25 d                                    | 3.26 cde                                   | 5.31 jklm                        |
| 46    | 55.44 m      | 24.39 n                    | 20.08 de               | 3.44 def                                   | 6.13 cd                                    |                                  |
| 47    | 55.67 mno    | 24.66 m                    | 19.76 ef               | 3.64 fg                                    | 5.81 cdefghi                               |                                  |
| 48    | 51.94 ef     | 24.91 l                    | 19.10 g                | 3.12 bc                                    | 5.79 defghi                                |                                  |
| III   | 4            | 60.58 v                    | 21.69 r                | 16.31 r                                    | 4.76 rs                                    | 5.14 lm                          |
|       | 6            | 58.47 t                    | 21.95 q                | 17.13 nop                                  | 4.83 s                                     | 4.17 o                           |
|       | 7            | 55.69 mno                  | 22.06 q                | 16.51 qr                                   | 4.01 jklmno                                | 4.98 mn                          |
|       | 10           | 56.01 mnop                 | 17.58 x                | 15.13 t                                    | 4.13 lmno                                  | 5.12 lm                          |
|       | 13           | 57.22 rs                   | 21.99 q                | 16.44 qr                                   | 4.54 qr                                    | 5.18 klm                         |

|    |            |         |            |             |          |
|----|------------|---------|------------|-------------|----------|
| 20 | 56.08 mnop | 21.62 r | 16.44 qr   | 4.29 opq    | 4.99 mn  |
| 24 | 56.34 opq  | 19.64 t | 16.12 rs   | 3.89 hijklm | 5.17 klm |
| 27 | 56.68 pqr  | 20.18 s | 17.47 lmn  | 4.09 klmno  | 5.09 m   |
| 29 | 57.11 rs   | 18.09 w | 16.81 pq   | 3.96 ijklm  | 5.08 m   |
| 32 | 57.23 rs   | 21.50 r | 16.46 qr   | 4.13 lmno   | 4.71 n   |
| 34 | 60.71 v    | 21.57 r | 17.17 nop  | 4.42 pq     | 5.02 mn  |
| 37 | 56.02 mnop | 19.32 u | 16.23 r    | 4.12 lmno   | 5.02 mn  |
| 38 | 56.85 qr   | 21.41 r | 16.51 qr   | 4.28 nop    | 4.33 o   |
| 39 | 57.75 s    | 18.33 v | 17.02 op   | 3.90 hijklm | 4.98 mn  |
| 41 | 59.80 u    | 16.75 y | 15.80 s    | 3.84 hijkl  | 5.09 m   |
| 43 | 62.09 w    | 16.87 y | 17.66 jklm | 3.88 hijklm | 5.07 m   |

---

Group I: high *TaER* expression; Group II: intermediate *TaER* expression; Group III: low *TaER* expression.

Lower case letters represent significant differences among the 48 wheat varieties ( $P < 0.05$ ). SD: stomatal density (No.  $\text{mm}^{-2}$ ); FLA: flag leaf area ( $\text{cm}^2$ ); A: photosynthetic rate ( $\mu\text{mol. m}^{-2} \text{s}^{-1}$ ); E: transpiration rate ( $\text{mmol. m}^{-2} \text{s}^{-1}$ ); WUEi: instant water use efficiency ( $\mu\text{mol. mmol}^{-1}$ ).
