# Supplementary material for: TaER Expression Is Associated with Transpiration Efficiency Traits and Yield in Bread Wheat
Source: PubMed Central journal article supplement (PMC4457575; doi:10.1371/journal.pone.0128415), 2015-06-05
Supplement: pone.0128415.s006.pdf [file pone.0128415.s006.pdf]

**S6 Table. Carbon isotope discrimination and yield-related traits of the 48 wheat varieties**

| Group | Genotype No.    | CID (‰)         | BYPP (g)    | GYPP (g)     | HI             |
|-------|-----------------|-----------------|-------------|--------------|----------------|
| I     | 1               | 21.09 abcd      | 41.35 cd    | 18.95 bc     | 0.46 cdefghijk |
|       | 3               | 21.16 abcdef    | 40.82 de    | 18.27 c      | 0.45 defghijk  |
|       | 35              | 21.11 abcde     | 42.42 bc    | 18.24 c      | 0.43 efghijk   |
|       | 36              | 21.09 abcd      | 44.60 a     | 19.24 b      | 0.43 efghijk   |
|       | 42              | 20.90 a         | 43.13 b     | 22.23 a      | 0.52 abcdefghi |
| II    | 2               | 21.66 hijklmno  | 35.93 ij    | 14.66 hi     | 0.41 efghijk   |
|       | 5               | 21.80 jklmnopqr | 35.79 ij    | 14.81 h      | 0.41 efghijk   |
|       | 8               | 21.37 defghi    | 38.99 ij    | 15.25 gh     | 0.39 efghijk   |
|       | 9               | 21.74 jklmnopq  | 31.31 no    | 16.02 efg    | 0.51 abcdefghi |
|       | 11              | 21.47 ghijk     | 33.31 kl    | 17.24 d      | 0.52 abcdefghi |
|       | 12              | 21.53 ghijk     | 35.99 ij    | 12.62 mno    | 0.35 hijk      |
|       | 14              | 21.34 cdefgh    | 36.31 hi    | 15.73 fg     | 0.43 defghijk  |
|       | 15              | 21.55 ghijk     | 33.99 kl    | 14.72 hi     | 0.43 defghijk  |
|       | 16              | 21.45 efghij    | 31.21 no    | 17.25 d      | 0.55 abcdefg   |
|       | 17              | 21.83 klmnopqr  | 34.56 jk    | 13.23 klmn   | 0.38 efghijk   |
|       | 18              | 21.80 jklmnopqr | 36.06 ij    | 14.23 hij    | 0.39 efghijk   |
|       | 19              | 21.59 ghijkl    | 31.65 mn    | 16.68 de     | 0.53 abcdefgh  |
|       | 21              | 21.46 fghijk    | 32.53 lmn   | 17.09 d      | 0.53 abcdefgh  |
|       | 22              | 21.65 hijklmn   | 28.80 pqrs  | 14.76 hi     | 0.51 abcdefghi |
|       | 23              | 21.53 ghijk     | 29.11 pqr   | 15.97 efg    | 0.55 abcdefgh  |
|       | 25              | 21.59 ghijkl    | 29.37 pq    | 15.43fgh     | 0.53 abcdefgh  |
|       | 26              | 21.34 cdefgh    | 29.97 op    | 16.21 ef     | 0.54 abcdefgh  |
|       | 28              | 21.56 ghijk     | 29.18 pqr   | 13.79 jk     | 0.47 bcdefghij |
|       | 30              | 21.63 ghijklm   | 37.70 gh    | 12.80 lmno   | 0.34 hijk      |
|       | 31              | 21.36 defgh     | 38.36 fg    | 13.91 ijk    | 0.36 ghijk     |
|       | 33              | 21.68 hijklmnop | 29.94 op    | 12.05 opqrst | 0.40 efghijk   |
|       | 40              | 21.27 bcdefg    | 38.53 fg    | 12.23 opqr   | 0.32 jk        |
|       | 44              | 21.56 ghijk     | 38.57 fg    | 12.38 nopq   | 0.32 ijk       |
|       | 45              | 21.76 jklmnopqr | 33.36 kl    | 12.16 opqr   | 0.36 fghijk    |
| 46    | 20.94 ab        | 33.10 klm       | 12.12 opqrs | 0.37 ghijk   |                |
| 47    | 21.00 abc       | 31.46 no        | 8.21 v      | 0.26 k       |                |
| 48    | 21.73 ijklmnopq | 39.78 ef        | 11.24 stu   | 0.28 k       |                |
| III   | 4               | 22.29 stuv      | 28.22 qrs   | 11.66 pqrstu | 0.41 efghijk   |
|       | 6               | 22.34 tuv       | 25.30 t     | 13.29 klm    | 0.53 abcdefgh  |
|       | 7               | 22.04 pqrst     | 27.57 rs    | 16.24 ef     | 0.59 abcde     |
|       | 10              | 22.03 pqrst     | 22.71 uvw   | 15.91 efg    | 0.70 a         |
|       | 13              | 21.95 lmnopqrs  | 27.73 rs    | 10.76 u      | 0.39 efghijk   |
|       | 20              | 22.07 qrstu     | 27.63 rs    | 15.80 efg    | 0.57 abcdef    |

|    |                |           |             |                |
|----|----------------|-----------|-------------|----------------|
| 24 | 22.03 pqrst    | 20.79 x   | 13.54 kl    | 0.65 abc       |
| 27 | 21.99 mnopqrst | 18.59 y   | 12.51 mnop  | 0.67 ab        |
| 29 | 22.02 opqrst   | 22.45 vw  | 11.21 tu    | 0.50 bcdefghij |
| 32 | 22.07 qrstu    | 24.12 tu  | 11.70 rstu  | 0.48 bcdefghij |
| 34 | 22.40 uv       | 22.58 uvw | 11.59 qrstu | 0.51 abcdefgh  |
| 37 | 22.01 nopqrst  | 22.12 vwx | 12.23 opqr  | 0.55 abcdefg   |
| 38 | 22.48 v        | 27.41s    | 15.24 gh    | 0.56 abcdefg   |
| 39 | 22.12 rstu     | 24.06 tu  | 15.24 gh    | 0.63 abcd      |
| 41 | 22.29 stuv     | 21.27 wx  | 7.84 v      | 0.37 efghijk   |
| 43 | 22.62 v        | 23.03 uv  | 8.47 v      | 0.37 ghijk     |

Group I: high *TaER* expression; Group II: intermediate *TaER* expression; Group III: low *TaER* expression. Lower case letters represent significant differences among the 48 wheat varieties ( $P < 0.05$ ). CID: carbon isotopic discrimination (%); BYPP: biomass yield per plant (g); GYPP: grain yield per plant (g); HI, harvest index.
